# Supplementary material for: Fabrication of PEGylated graphitic carbon nitride quantum dots as traceable, pH-sensitive drug delivery systems
Source: Royal Society of Chemistry journal article supplement (doi:10.1039/c8nj02542h), 2018-01-01
Supplement: c8nj02542h1.pdf [file c8nj02542h1.pdf]

## Supplementary data

### **Fabrication of PEGylated graphitic carbon nitride quantum dots as traceable, pH-sensitive drug delivery systems**

Jian Dong,<sup>‡\*a</sup> Yanli Zhao,<sup>‡a</sup> Hongyu Chen,<sup>a</sup> Li Liu,<sup>a</sup> Wenxian Zhang,<sup>a</sup> Baoliang Sun,<sup>b</sup> Mingfeng Yang,<sup>b</sup> Yi Wang,<sup>c</sup> and Lifeng Dong<sup>\*a</sup>

<sup>a</sup> School of Chemistry and Pharmaceutical Engineering, Taishan Medical University, Taian, 271016, P. R. China. E-mail: [lfdong@tsmc.edu.cn](mailto:lfdong@tsmc.edu.cn) and [dongjian@tsmc.edu.cn](mailto:dongjian@tsmc.edu.cn)

<sup>b</sup> Key Laboratory of Cerebral Microcirculation in Universities of Shandong and Department of Neurology of Affiliated Hospital, Taishan Medical University, Taian, Shandong 271016, P. R. China

<sup>c</sup> Institute of Optometry and Department of Ophthalmology of Affiliated Hospital, Taishan Medical University, Taian, Shandong 271016, P. R. China

<sup>‡</sup>These two authors contributed equally.

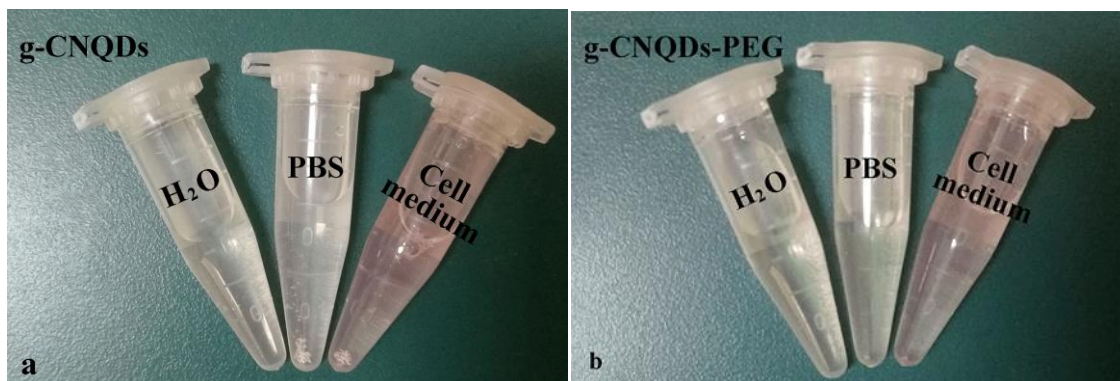

**Fig. S1** The stability of (a) g-CNQDs in water, PBS, and cell medium after 48 h; and the stability of (b) g-CNQDs-PEG in water, PBS, and cell medium after 30 days.

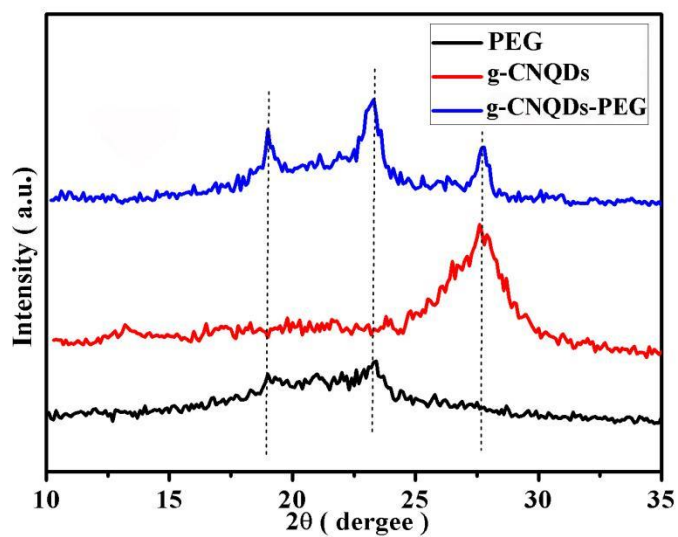

**Fig. S2** The XRD spectra of g-CNQDs, g-CNQDs-PEG, and PEG.

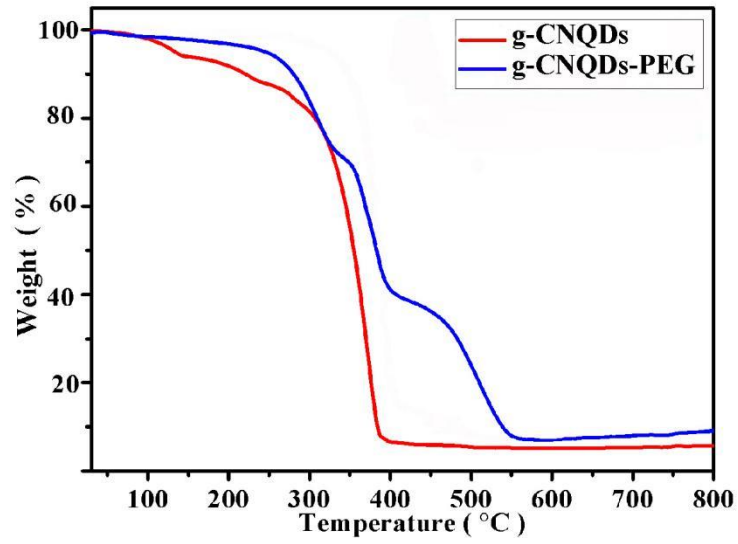

**Fig. S3** TGA (in N<sub>2</sub>) of g-CNQDs and g-CNQDs-PEG with a heating rate of 5 °C min<sup>-1</sup>.

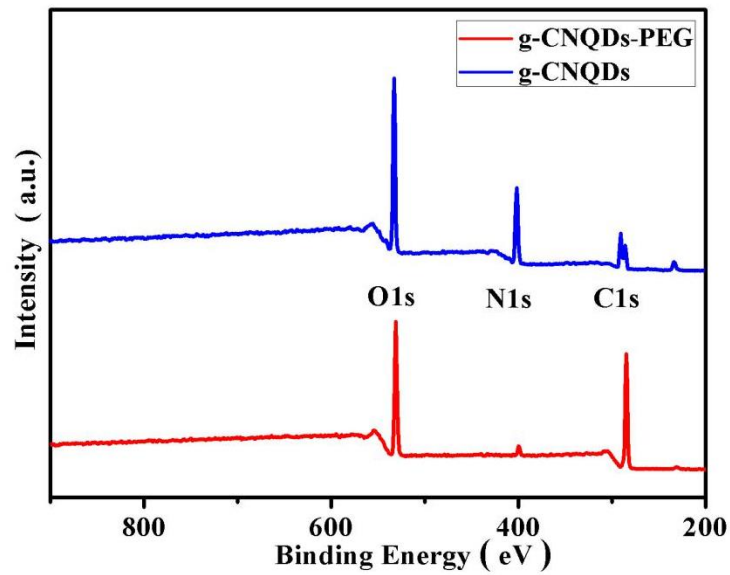

**Fig. S4** Survey XPS spectra of g-CNQDs and g-CNQDs-PEG.

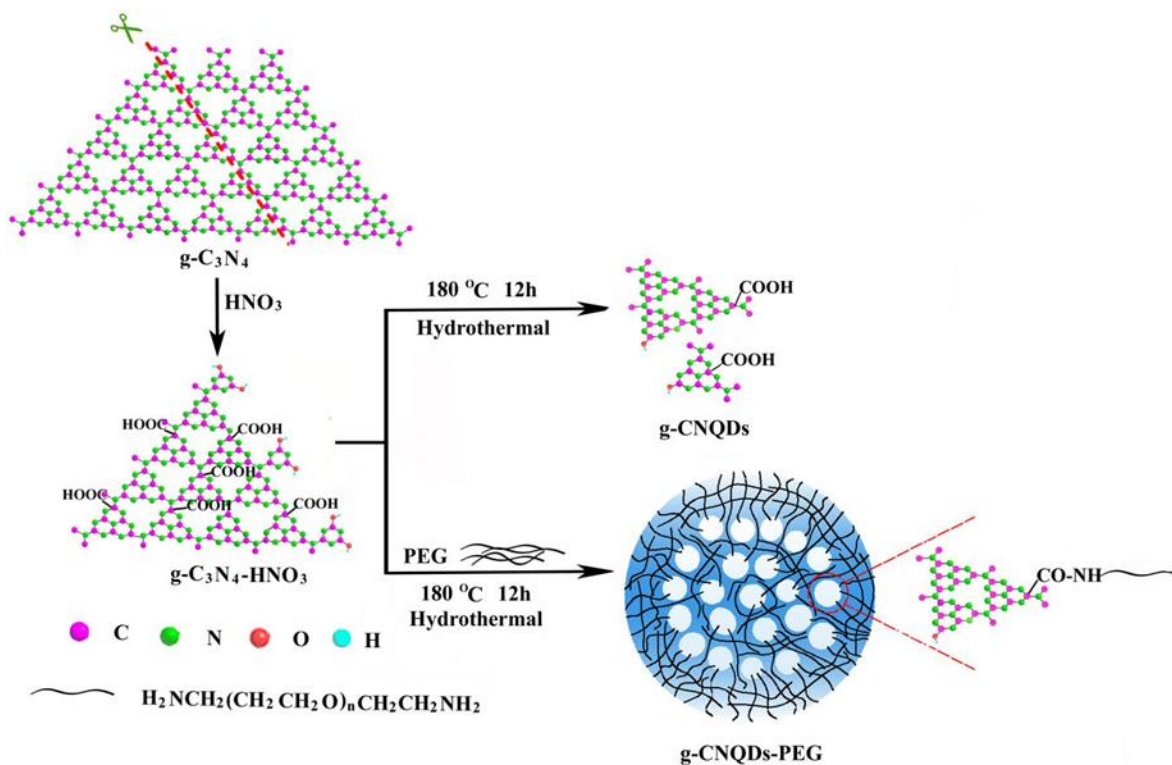

**Fig. S5** Illustration of the synthesis of g-CNQDs and g-CNQDs-PEG.

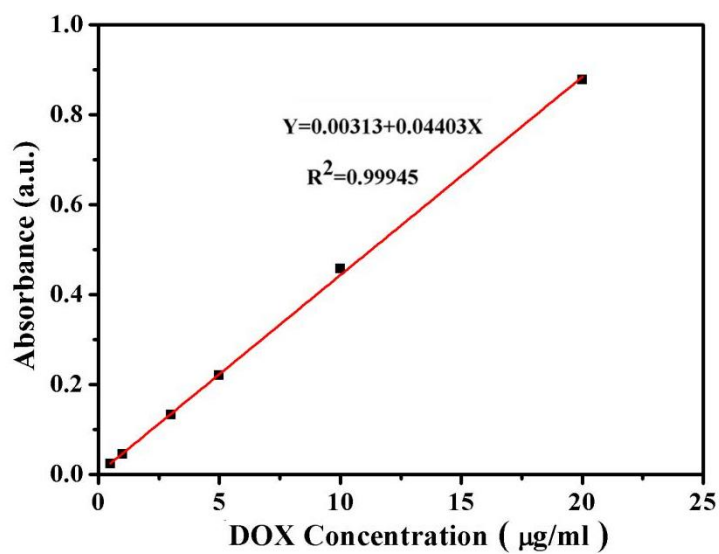

**Fig. S6** UV-Vis absorbance standard curve of DOX at 480 nm.

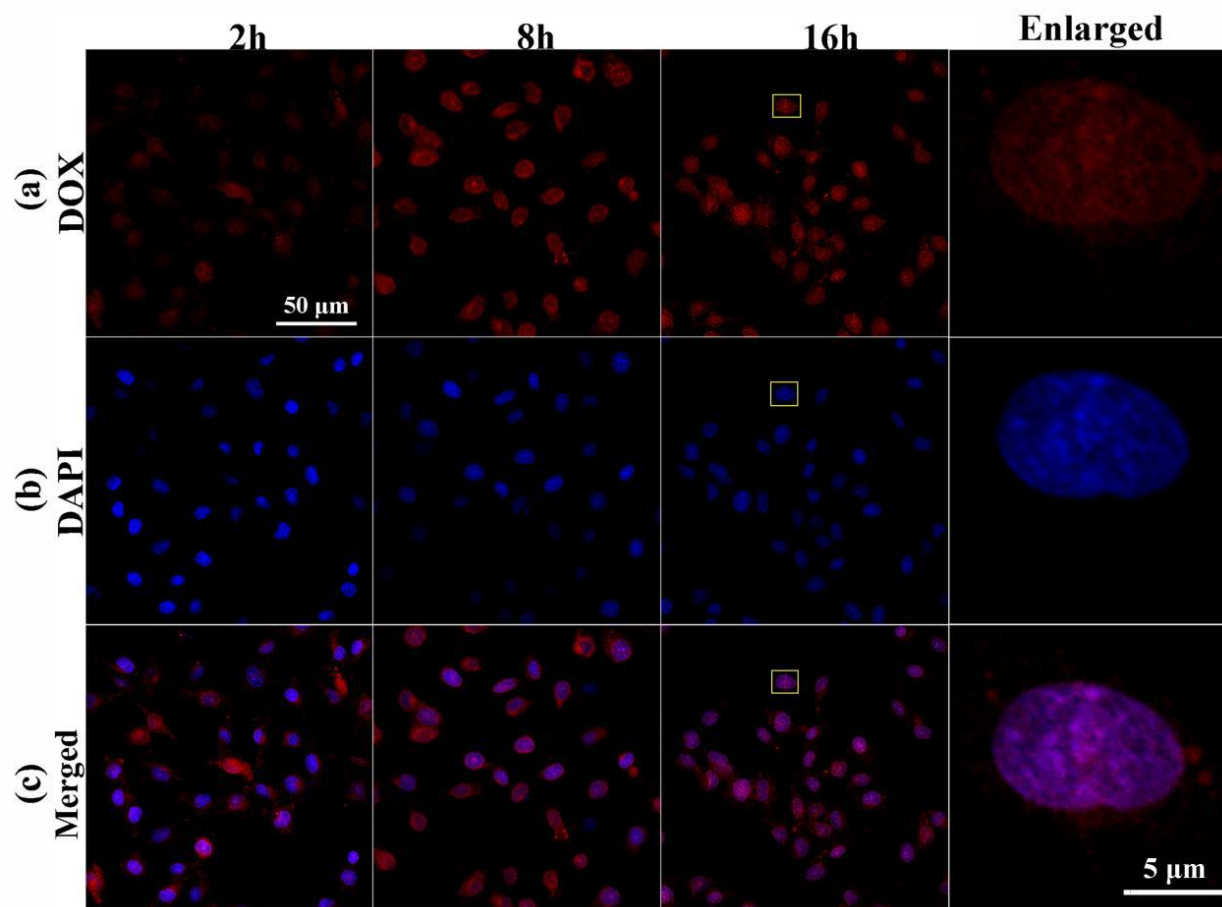

**Fig. S7** CLSM images of U251 cells treated with g-CNQDs-PEG at a concentration of  $5 \mu\text{g mL}^{-1}$  after incubation for 2, 8, and 16 h: (a) DOX excited by a 405 nm laser and signals collected in the range of  $595\pm 50 \text{ nm}$ ; (b) cell nuclei stained with DAPI excited by a 405 nm laser and signals collected from  $450\pm 50 \text{ nm}$ ; (c) merged images of DOX and DAPI.
